# Supplementary material for: Improved Eating Behaviour and Nutrient Intake in Noncompliant Patients with Phenylketonuria after Reintroducing a Protein Substitute: Observations from a Multicentre Study
Source: MDPI journal article supplement (doi:10.3390/nu11092035), 2019-08-30
Supplement: s1 [file s1]

## Supplementary table S1

### Improved Eating Behaviour and Nutrient Intake in Noncompliant Patients with Phenylketonuria after Reintroducing a Protein Substitute; Observations from a Multicentre Study

Supplementary Table. Subjective measures of mood.

| Mood state    | Day 1   | Day 17  | Day 31  | P value <sup>1</sup> | P value <sup>2</sup> | P value <sup>3</sup> |
|---------------|---------|---------|---------|----------------------|----------------------|----------------------|
| Activity      | 4.2±1.0 | 4.8±1.4 | 5.0±1.0 | P = 0.620            | P = 0.451            | P = 0.741            |
| Anger         | 1.1±0.6 | 0.9±0.4 | 1.6±1.1 | P = 0.668            | P = 0.708            | P = 0.365            |
| Anxiety       | 3.3±1.0 | 1.0±0.4 | 1.0±0.3 | P = 0.050            | P = 0.048*           | P = 1.000            |
| Confusion     | 2.8±0.9 | 1.3±0.5 | 1.5±0.5 | P = 0.048*           | P = 0.265            | P = 0.711            |
| Depression    | 2.0±1.6 | 0.9±0.5 | 2.1±1.3 | P = 0.357            | P = 0.956            | P = 0.393            |
| Tiredness     | 3.9±1.6 | 2.1±0.6 | 1.8±1.1 | P = 0.314            | P = 0.342            | P = 0.662            |
| Combined mood | 6.6±4.4 | 0.5±2.1 | 0.9±3.3 | P = 0.175            | P = 0.357            | P = 0.880            |

<sup>1</sup>Baseline compared to day 17. <sup>2</sup>Baseline compared to day 31. <sup>3</sup>Day 17 compared to day 31. \* signifies a significant difference of P<0.05.
